# Supplementary material
Source: PubMed Central journal article supplement (PMC1887608)

**A**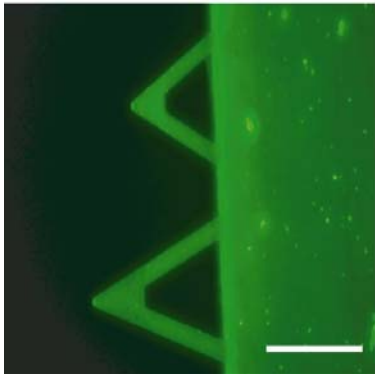**B**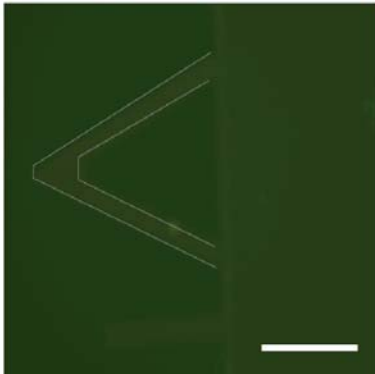**C**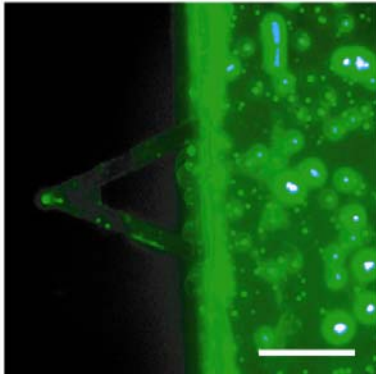

Supplement: pnas_0702668104_1.pdf [file pnas_0702668104_1.pdf]

**A**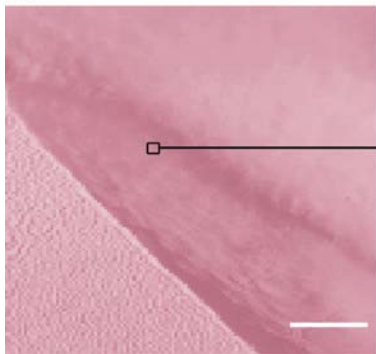**B**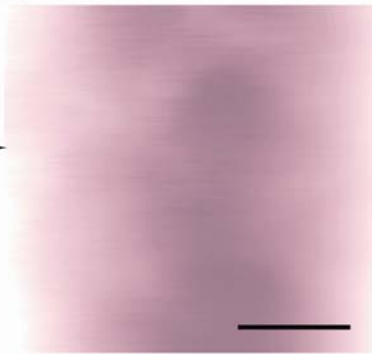**C**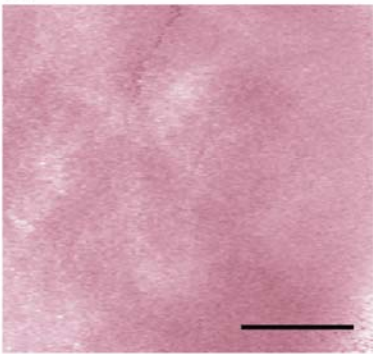

Supplement: pnas_0702668104_2.pdf [file pnas_0702668104_2.pdf]

**A**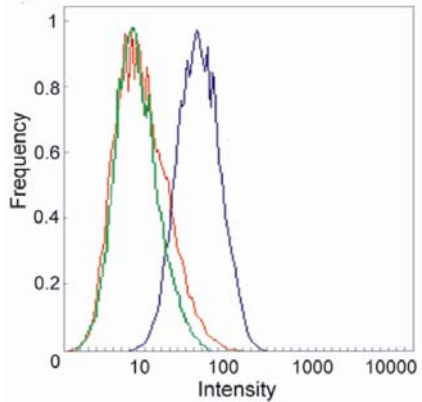**B**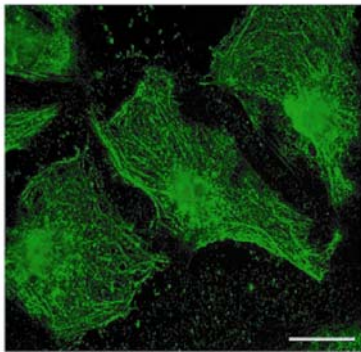**C**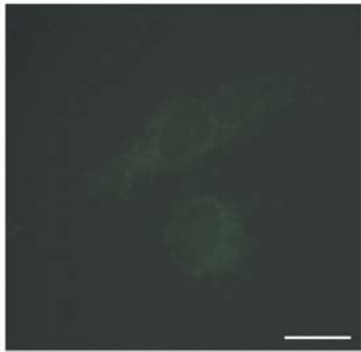

Supplement: pnas_0702668104_3.pdf [file pnas_0702668104_3.pdf]
